# Supplementary material for: Multifunctional Monoclonal Antibody Targeting Pseudomonas aeruginosa Keratitis in Mice
Source: PubMed Central journal article supplement (PMC7712430; doi:10.3390/vaccines8040638), 2020-11-02
Supplement: vaccines-08-00638-s001.pdf [file vaccines-08-00638-s001.pdf]

|                 | Epithelial Score 0                                                                 |                                                                                      | Epithelial Score 1 |     |
|-----------------|------------------------------------------------------------------------------------|--------------------------------------------------------------------------------------|--------------------|-----|
| Opacity Score 0 | 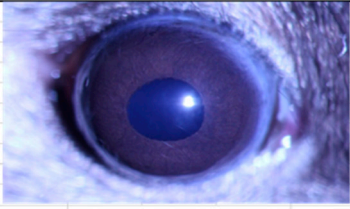  |    | E=0                | O=0 |
| Opacity Score 1 |   |    | E=0                | O=1 |
| Opacity Score 2 |   |    | E=0                | O=2 |
| Opacity Score 3 |  |   | E=0                | O=3 |
| Hyphema         |                                                                                    |  |                    |     |
| Hypopyon        |                                                                                    |  |                    |     |

**Figure S1.** Representative corneal images. Each image provides a sense of the scoring for the Opacity and Epithelial scoring.

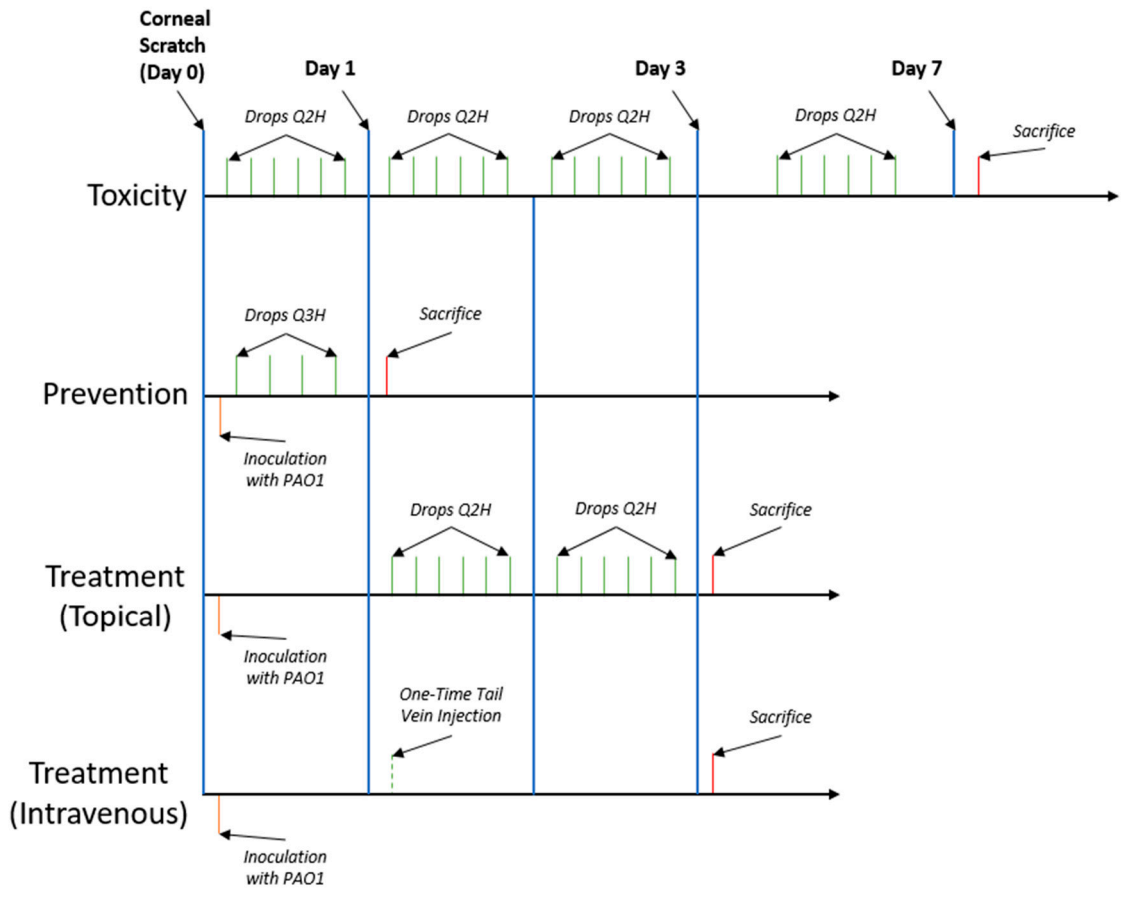

**Figure S2.** Overall Timescale for Toxicity, Prevention, Topical Treatment, and Intravenous treatment experiments.
